# Supplementary material
Source: publisher figshare collection journal article supplement (https://tandf.figshare.com/ndownloader/files/33158098)
Supplement: Supplementary file 1 [file 33158098]

| miRNA | Primers for reverse transcription PCR | Primers for qRT-PCR |
| --- | --- | --- |
| gga-miR-135a-5p | GTCGTATCCAGTGCAGGGTCCGAGGTATTCGCACTGGATACGACTCACAT | CGCGTATGGCTTTTTATTCCT |
| AGTGCAGGGTCCGAGGTATT |
| gga-miR-200a-3p | GTCGTATCCAGTGCAGGGTCCGAGGTATTCGCACTGGATACGACACATCG | GCGCGTAACACTGTCTGGTAA |
| AGTGCAGGGTCCGAGGTATT |
| miR-195-x | GTCGTATCCAGTGCAGGGTCCGAGGTATTCGCACTGGATACGACTGCCAA | GCGCGTAGCAGCACAGAAATA |
| AGTGCAGGGTCCGAGGTATT |
| novel-m0270-5p | GTCGTATCCAGTGCAGGGTCCGAGGTATTCGCACTGGATACGACACTCTC | CGCGCGTAGAGAGACACTCATA |
| AGTGCAGGGTCCGAGGTATT |
| novel-m0067-5p | GTCGTATCCAGTGCAGGGTCCGAGGTATTCGCACTGGATACGACAAAGAG | GCGCGAACAGAGGTGGTGTA |
| AGTGCAGGGTCCGAGGTATT |

Table S1. Primers for the qRT-PCR
